# Supplementary material
Source: Springer Nature journal article supplement (https://www.springermedizin.de/resource/supplementary/12880_2013_199_MOESM4_ESM.pdf/9450210)

(a)

HF-US vs ex vivo callipers

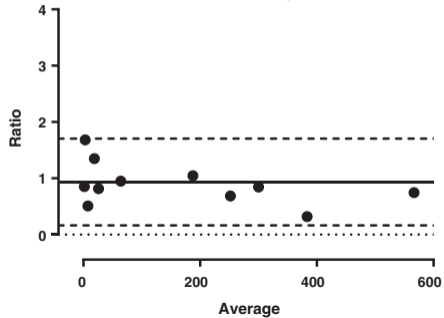

(b)

*in vivo* callipers vs *ex vivo* callipers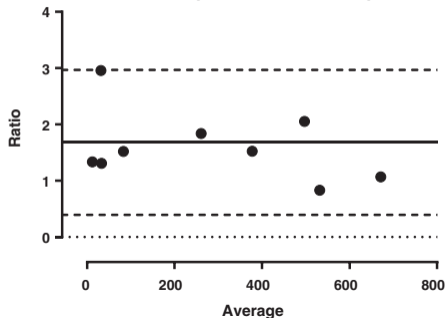

Supplement: MOESM4 [file 9450210]
